# Supplementary material for: Lignin–cellulose complexes derived from agricultural wastes for combined antibacterial and tissue engineering scaffolds for cutaneous leishmaniasis wounds
Source: Royal Society of Chemistry journal article supplement (doi:10.1039/d4tb00458b), 2024-01-01
Supplement: d4tb00458b1.pdf [file d4tb00458b1.pdf]

**Table S1: Assignment of bands obtained from the FTIR spectrum of the three extracted lignin sample.**

| Wavenumber<br>(cm <sup>-1</sup> ) | Peak assignment                                                                                                         | Lignin |     |     |
|-----------------------------------|-------------------------------------------------------------------------------------------------------------------------|--------|-----|-----|
|                                   |                                                                                                                         | SCB    | HT1 | HT2 |
| 3362-3404                         | Hydroxyl group (O-H) stretching from aliphatic and phenolic groups                                                      | +      | +   | +   |
| 2918-2960                         | C-H vibrations in methyl and methylene groups.                                                                          | +      | +   | +   |
|                                   | C-H stretch in alkyl groups.                                                                                            |        |     |     |
| 2841-2850                         | C-H vibrations in methyl and methylene groups                                                                           | +      | +   | +   |
| 1634-1656                         | Conjugated C=O stretching in carbonyl groups                                                                            | +      | +   | +   |
| 1592                              | C=O stretching, aromatic skeletal vibrations                                                                            | -      | +   | +   |
| 1504 -1506                        | C=C-C aromatic ring stretching vibration                                                                                | +      | +   | +   |
| 1459-1461                         | Asymmetric C-H deformation of methyl and methylene groups in ether bond.                                                | +      | +   | +   |
|                                   | Characteristics of HGS lignin                                                                                           |        |     |     |
| 1420                              | C=O stretching, aromatic skeletal vibrations                                                                            | -      | -   | +   |
| 1326-1327                         | C-O grouping in S unit.                                                                                                 | +      | +   | +   |
|                                   | Condensed G and S units.                                                                                                |        |     |     |
|                                   | O-H deformation and CH <sub>2</sub> angular deformation                                                                 |        |     |     |
| 1259-1266                         | C-O vibration in G unit                                                                                                 | +      | +   | +   |
| 1221-1222                         | C-C, C-O and C=O stretching                                                                                             | -      | +   | +   |
| 1118-1120                         | C=O stretching of G units.                                                                                              | +      | +   | +   |
|                                   | Expansion and contraction of aromatic ring                                                                              |        |     |     |
| 1021-1034                         | C-H in plane deformation in G units.                                                                                    | +      | +   | +   |
|                                   | C-O deformation in primary alcohols.                                                                                    |        |     |     |
|                                   | Symmetrical stretching in C-O-C.                                                                                        |        |     |     |
| 800-831                           | C-H deformation out of plane on all positions of H unit, at positions 2, 5, 6 of G units and positions 2, 6 of S units. | +      | +   | +   |

**Table S2: Thermal analysis of SCB, HT1 and HT2 lignin.**

| Peak                    | Temperature/°C |       |       |
|-------------------------|----------------|-------|-------|
|                         | HT1            | HT2   | SCB   |
| Water evaporation       | 58.1           | 54.1  | 52.3  |
| β-O-4 linkages cleavage | 255.8          | 280.0 | 275.5 |
| Major decomposition     | 336.8          | 341.5 | 275.5 |

**Table S3: Swelling rate constant ( $k_s$ ) of hydrogels in PBS at different pH.**

| Hydrogel      | pH     |               |               |
|---------------|--------|---------------|---------------|
|               | 5      | 7.4           | 8             |
| BC 100%       | 0.0157 | 0.0013        | <b>0.0352</b> |
| BC:BLig 90:10 | 0.0172 | <b>0.2010</b> | 0.0142        |
| BC:BLig 80:20 | 0.0232 | <b>0.0328</b> | 0.0116        |
| BC:BLig 70:30 | 0.0146 | <b>0.1407</b> | 0.0392        |
| BC:BLig 60:40 | 0.0159 | 0.0195        | <b>0.1173</b> |

BC: Bagasse cellulose, BLig: Bagasse lignin

**Table S4: Release kinetics and release mechanism of lignin at different pH.**

| pH  | Cel-Lig Hydrogel | Release Kinetics          |                            |                        |                                 |         | Drug Release mechanism  |
|-----|------------------|---------------------------|----------------------------|------------------------|---------------------------------|---------|-------------------------|
|     |                  | Zero order R <sup>2</sup> | First order R <sup>2</sup> | Higuchi R <sup>2</sup> | Korsmeyer-Peppas R <sup>2</sup> | n       |                         |
| 5   | BC:Blig 90:10    | 0.2807                    | 0.2834                     | 0.4491                 | <b>0.637</b>                    | 0.05754 | Quasi-Fickian diffusion |
|     | BC:Blig 80:20    | 0.2734                    | 0.3025                     | 0.4419                 | <b>0.7967</b>                   | 0.0522  |                         |
|     | BC:Blig 70:30    | 0.2822                    | 0.3098                     | 0.4512                 | <b>0.6857</b>                   | 0.05769 |                         |
|     | BC:Blig 60:40    | 0.2184                    | 0.2572                     | 0.3673                 | <b>0.6919</b>                   | 0.03593 |                         |
| 7.4 | BC:Blig 90:10    | 0.6829                    | 0.4934                     | 0.8767                 | <b>0.9297</b>                   | 0.9071  | Non-Fickian diffusion   |
|     | BC:Blig 80:20    | 0.7079                    | 0.4971                     | 0.8953                 | <b>0.94</b>                     | 0.728   |                         |
|     | BC:Blig 70:30    | 0.7092                    | 0.5181                     | 0.895                  | <b>0.9395</b>                   | 0.9373  |                         |
|     | BC:Blig 60:40    | 0.7359                    | 0.5427                     | 0.9043                 | <b>0.9508</b>                   | 1.031   |                         |
| 8   | BC:Blig 90:10    | 0.4658                    | 0.5914                     | 0.6389                 | <b>0.7972</b>                   | 0.1017  | Quasi-Fickian diffusion |
|     | BC:Blig 80:20    | 0.5045                    | 0.6581                     | 0.683                  | <b>0.9282</b>                   | 0.1048  |                         |
|     | BC:Blig 70:30    | 0.4982                    | 0.6581                     | 0.6782                 | <b>0.9592</b>                   | 0.1026  |                         |
|     | BC:Blig 60:40    | 0.4152                    | 0.5639                     | 0.5993                 | <b>0.9266</b>                   | 0.0857  |                         |

BC: Bagasse cellulose, BLig: Bagasse lignin

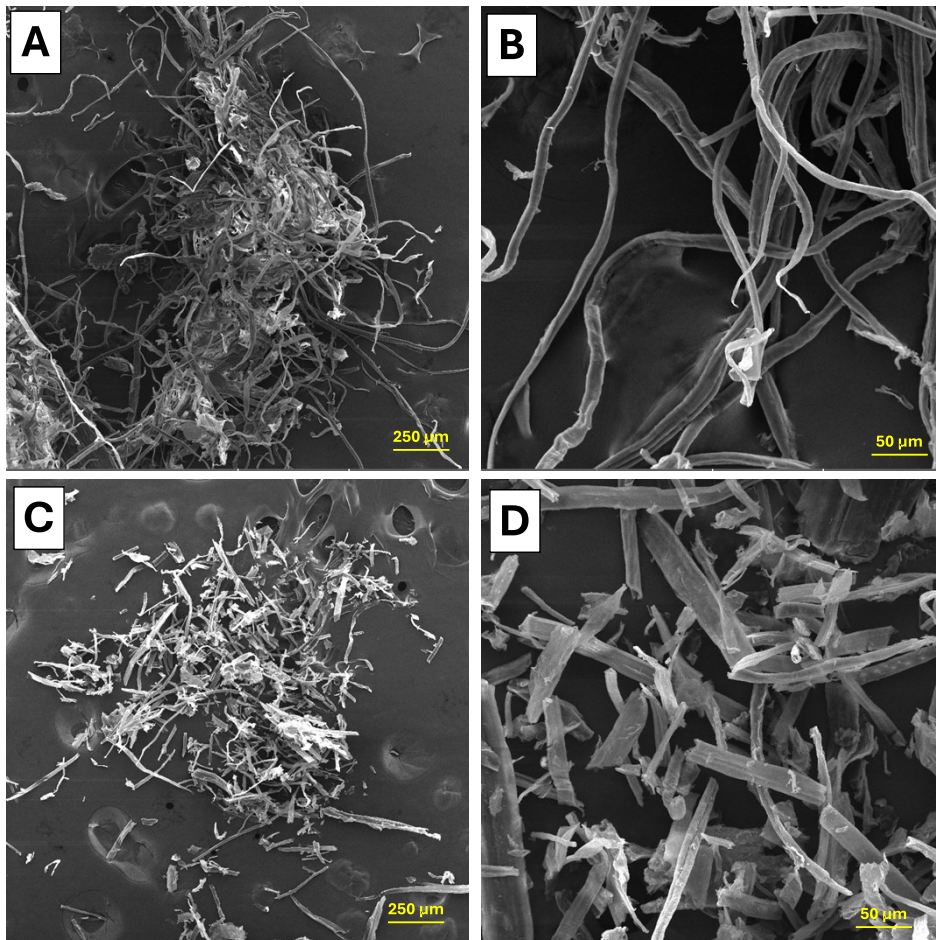

**Figure S1: SEM images of SCB cellulose (A-B) and SCB cellulose following an acid hydrolysis (C-D).**

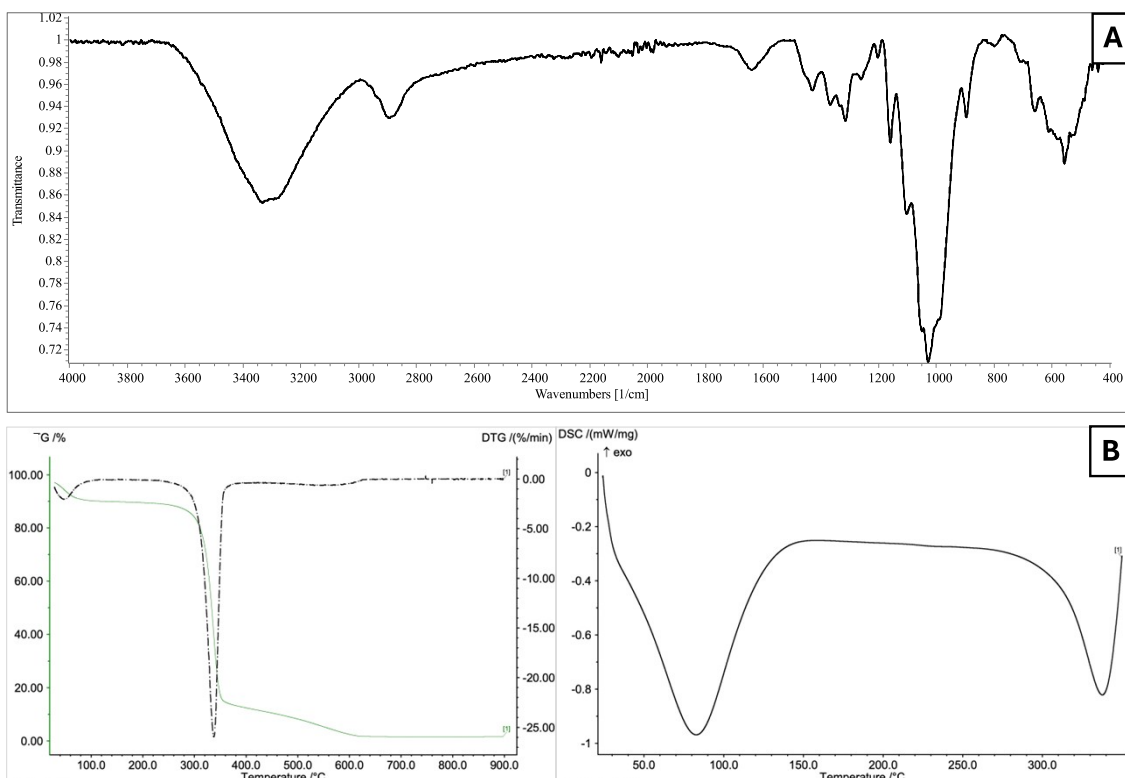

**Figure S2: (A) FTIR spectrum of SCB cellulose and (B) Outcome of the SCB cellulose thermal analysis, where the left graph illustrates the TGA and DTG curves and the right graph represents the DSC curve.**

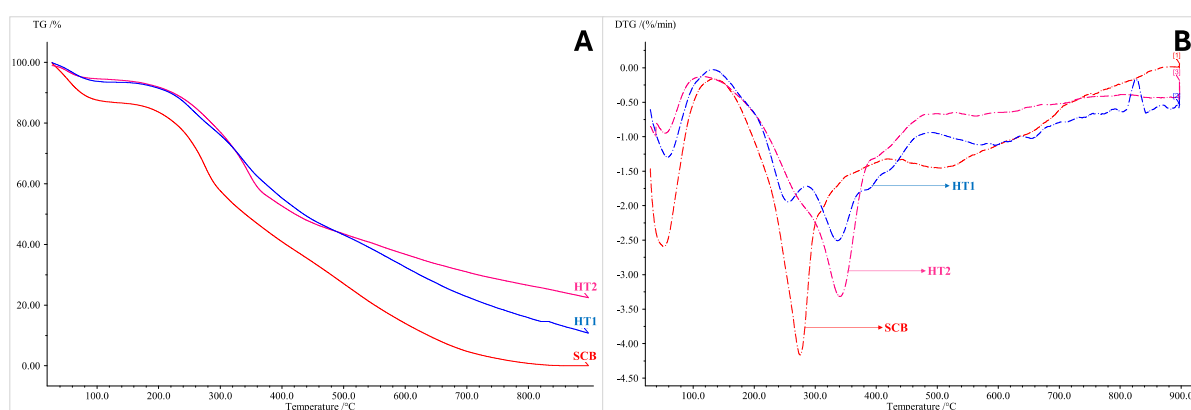

**Figure S3: TGA (A) and DTG (B) curves of extracted lignin samples.**

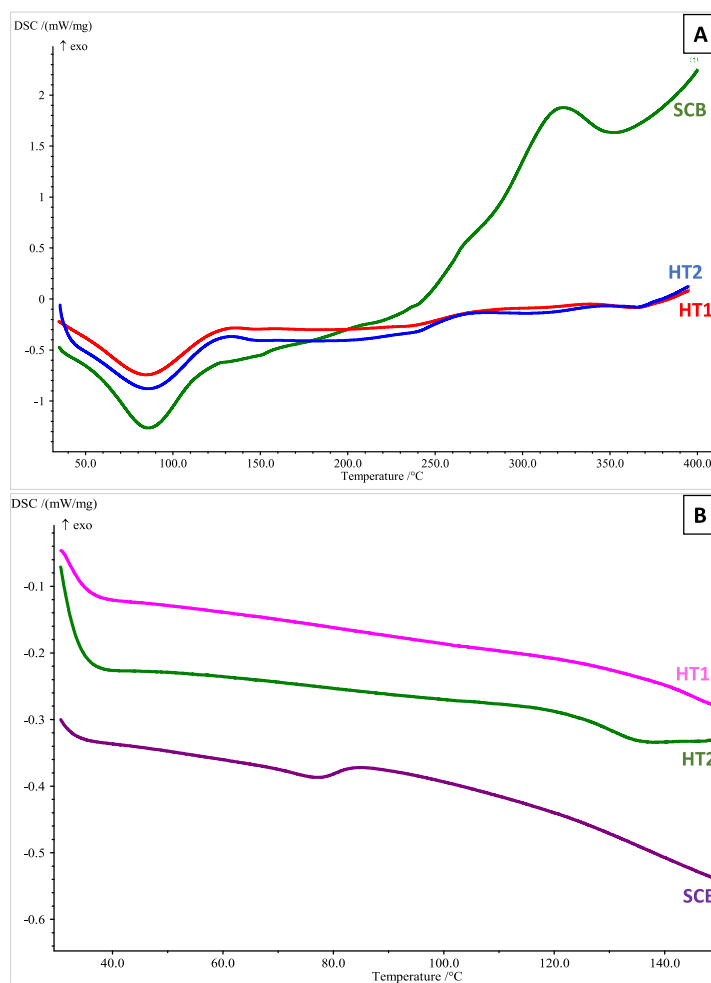

**Figure S4: DSC curves of SCB, HT1 and HT2 lignin samples, where (A) without cooling and (B) without cooling.**

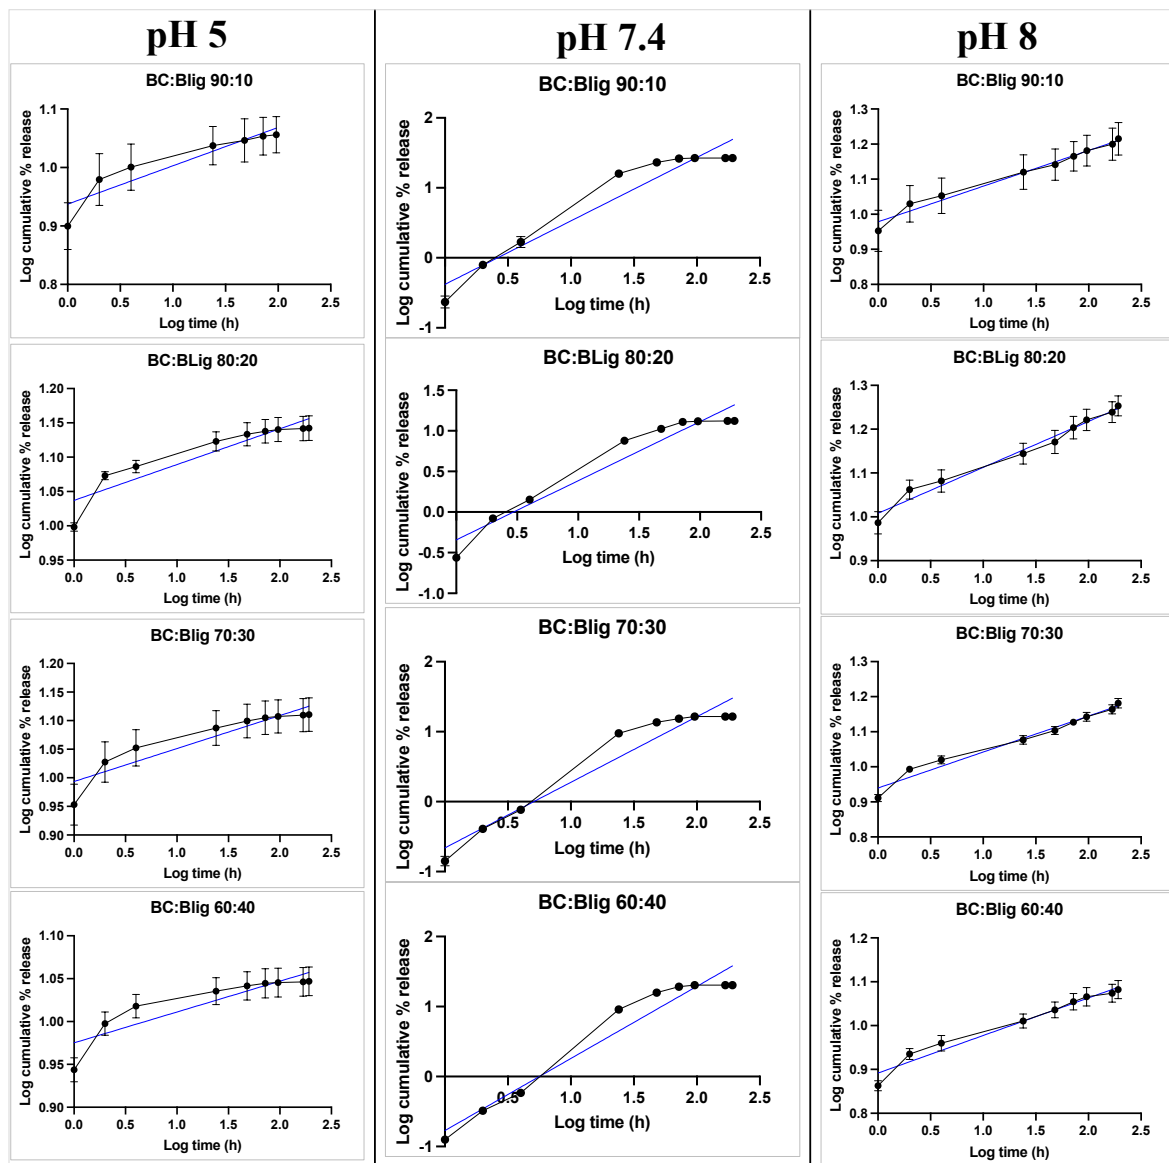

**Figure S5: Graphical representation of the best-suited swelling kinetics at different pH, where BC: bagasse cellulose, Blig: bagasse lignin.**
